# Supplementary material for: 3D Chitosan-Gallic Acid Complexes: Assessment of the Chemical and Biological Properties
Source: MDPI journal article supplement (doi:10.3390/gels8020124), 2022-02-15
Supplement: s1 [file s1]

## Article

# 3D Chitosan-Gallic Acid Complexes: Assessment of the Chemical and Biological Properties

Maria Marzano<sup>1</sup>, Nicola Borbone<sup>2,3</sup>, Felice Amato<sup>4,5</sup>, Giorgia Oliviero<sup>3,4</sup>, Pierpaolo Fucile<sup>6</sup>, Teresa Russo<sup>7</sup>, Filomena Sannino<sup>8,\*</sup>

<sup>1</sup> Institute of Applied Sciences and Intelligent Systems Unit of Naples, National Research Council, Via Pietro Castellino 111, 80131 Naples, Italy; [maria.marzano@na.isasi.cnr.it](mailto:maria.marzano@na.isasi.cnr.it)

<sup>2</sup> Department of Pharmacy, University of Naples Federico II, Via Domenico Montesano 49, 80131 Naples, Italy; [nicola.borbone@unina.it](mailto:nicola.borbone@unina.it)

<sup>3</sup> ISBE-IT, University of Naples Federico II, 80138 Naples, Italy

<sup>4</sup> Department of Molecular Medicine and Medical Biotechnologies, University of Naples Federico II, Via Sergio Pansini 5, 80131 Naples, Italy; [felice.amato@unina.it](mailto:felice.amato@unina.it), [giorgia.oliviero@unina.it](mailto:giorgia.oliviero@unina.it)

<sup>5</sup> CEINGE-Biotecnologie avanzate, Via Gaetano Salvatore 486, 80131 Naples, Italy

<sup>6</sup> Department of Advanced Biomedical Sciences, University of Naples Federico II, Via Sergio Pansini 5, 80131 Naples, Italy; [pierpaolo.fucile@unina.it](mailto:pierpaolo.fucile@unina.it)

<sup>7</sup> Institute of Polymers, Composites and Biomaterials, National Research Council, Viale J. F. Kennedy 54, Pad. 20 Mostra d'Oltremare, 80125 Naples, Italy; [teresa.russo@cnr.it](mailto:teresa.russo@cnr.it)

<sup>8</sup> Department of Agricultural Sciences, University of Naples Federico II, Via Università 100, 80055 Portici, Naples, Italy; [fsannino@unina.it](mailto:fsannino@unina.it)

\* Correspondence: [fsannino@unina.it](mailto:fsannino@unina.it)

**Table S1.** Amount of GA adsorbed on 3D chitosan at different pH values after incubation with 1 mM GA for 24 h.

| pH  | GA Adsorbed (mmol/kg) |
|-----|-----------------------|
| 3.0 | 41 ± 1.53             |
| 4.0 | 111 ± 3.66            |
| 5.0 | 109 ± 3.55            |
| 6.0 | 109 ± 3.43            |
| 7.0 | 108 ± 3.20            |
| 8.0 | 105 ± 3.22            |
| 9.0 | 100 ± 3.00            |
